# Supplementary material for: Germline Variants of Prostate Cancer in Japanese Families
Source: PLoS One. 2016 Oct 4;11(10):e0164233. doi: 10.1371/journal.pone.0164233 (PMC5049788; doi:10.1371/journal.pone.0164233)
Supplement: S2 Table — ID, ID of each individual; Depth, mean depth of each sample; Coverage, coverage at depth of 20. (XLSX) [file pone.0164233.s002.xlsx]

## Sheet: Table S3
ID	Depth	Coverage (depth=20)
GFPC023	67.95	0.798901
GFPC025	77.6	0.817608
GFPC028	69.47	0.807972
GFPC029	78.37	0.821012
GFPC031	69.6	0.792314
GFPC033	74.1	0.811004
GFPC035	79.35	0.828666
GFPC038	60.96	0.765481
GFPC039	74.66	0.825071
GFPC041	73.52	0.805671
GFPC044	77.91	0.827661
GFPC045	74.7	0.815739
GFPC048	81.15	0.827452
GFPC050	78.27	0.812308
GFPC051	80.4	0.835883
GFPC053	58.47	0.745548
GFPC056	66.27	0.803001
GFPC058	66.2	0.799305
GFPC059	80	0.837427
GFPC062	75.77	0.829699
GFPC064	70.21	0.819377
GFPC065	73.38	0.827633
GFPC067	78.18	0.840135
GFPC070	74.95	0.826718
GFPC071	66.55	0.784303
GFPC074	59.09	0.779818
GFPC075	65.44	0.783255
GFPC078	83.03	0.848806
GFPC080	81	0.855045
GFPC082	77.79	0.849414
GFPC084	81.36	0.840331
GFPC085	66.69	0.798585
GFPC087	82.84	0.821457
GFPC089	58.79	0.744376
GFPC091	58.59	0.743207
GFPC093	65.2	0.771993
GFPC095	71.37	0.792197
GFPC098	54.37	0.721711
GFPC099	72.85	0.797167
GFPC102	77.95	0.811748
GFPC104	82.08	0.82235
GFPC105	57.14	0.72687
GFPC107	59.78	0.72912
GFPC109	63.06	0.75839
GFPC111	63.43	0.76078
GFPC114	83.62	0.827905
GFPC116	78.41	0.81405
GFPC118	71.09	0.788656
GFPC120	80.31	0.843885
GFPC121	68.54	0.810599
GFPC123	75.89	0.822779
GFPC125	67.23	0.810713
GFPC127	75.54	0.827784
GFPC129	74.04	0.832269
GFPC131	70.86	0.815305
GFPC133	76.09	0.831658
GFPC136	84.38	0.858428
GFPC138	79.55	0.851185
GFPC139	78.47	0.840893
AVERAGE	72.4383	0.807434
