# Supplementary material for: Germline Variants of Prostate Cancer in Japanese Families
Source: PLoS One. 2016 Oct 4;11(10):e0164233. doi: 10.1371/journal.pone.0164233 (PMC5049788; doi:10.1371/journal.pone.0164233)
Supplement: S3 Table — Family, ID of the large prostate cancer families; Variants; total number of variants detected in each family; Shared variants, number of shared variants in each family. (XLSX) [file pone.0164233.s003.xlsx]

## Sheet: Table S2
Family	Variants	Shared variants
Fam01	155574	82212
Fam02	151283	85764
Fam03	149115	86927
Fam04	151281	81945
Fam05	150733	87027
Fam06	163584	79146
Fam07	161047	79362
SUM	1082617	582383
AVERAGE	154660	83197.6
